# Supplementary material for: Probenecid‐Boosted Tenofovir: A Physiologically‐Based Pharmacokinetic Model‐Informed Strategy for On‐Demand HIV Preexposure Prophylaxis
Source: PubMed Central journal article supplement — CPT Pharmacometrics Syst Pharmacol. 2019 Dec 23;9(1):40–7. doi: 10.1002/psp4.12481 (PMC6966182; doi:10.1002/psp4.12481), 2019-12-23
Supplement: PSP4-9-40-s001.pdf [file PSP4-9-40-s001.pdf]

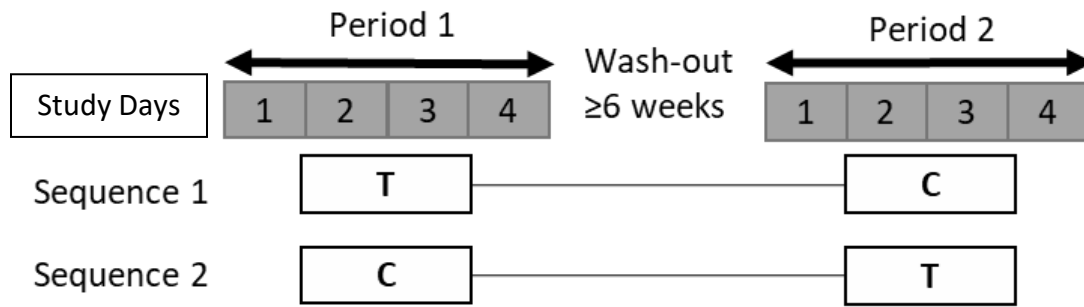

**Figure S1.** Study Design. Study periods are shown in days 1-4. Study interventions are (1) Test +PRO Treatment = 2 g PRO + 600 mg TDF/ 400 mg FTC at t=0 h or (2) Control IPERGAY Treatment = 600 mg TDF/ 400 mg FTC at t=0 h; 300 mg TDF/ 200 mg FTC at t= 24, 48 h. Treatment regimens were separated by  $\geq 6$  weeks wash-out period.
