# Supplementary material for: Probenecid‐Boosted Tenofovir: A Physiologically‐Based Pharmacokinetic Model‐Informed Strategy for On‐Demand HIV Preexposure Prophylaxis
Source: PubMed Central journal article supplement — CPT Pharmacometrics Syst Pharmacol. 2019 Dec 23;9(1):40–7. doi: 10.1002/psp4.12481 (PMC6966182; doi:10.1002/psp4.12481), 2019-12-23
Supplement: PSP4-9-40-s002.pdf [file PSP4-9-40-s002.pdf]

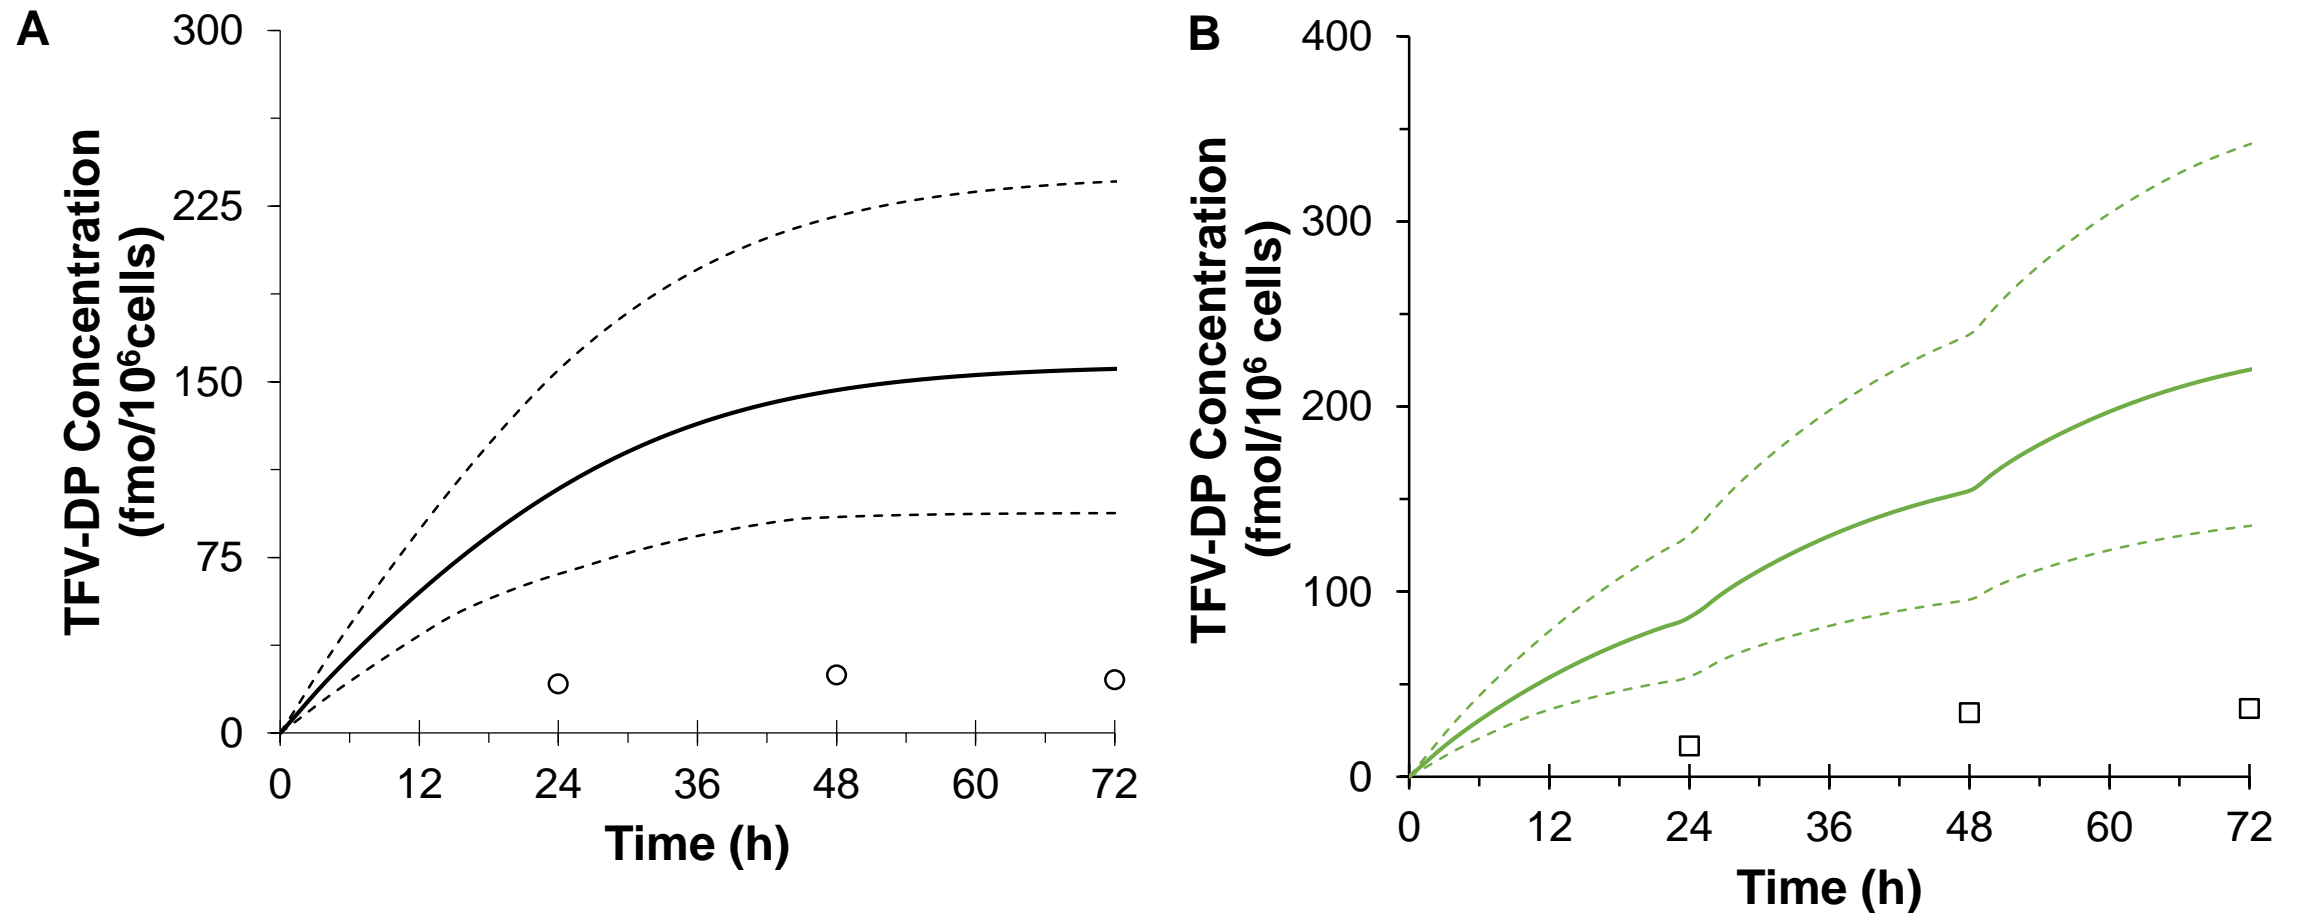

**Figure S2.** PBMC Concentration-time profiles of single-dose PRO “boosted” TFV-DP (A) and On-Demand IPERGAY TFV-DP (B) predicted by PBPK model and overlaid by clinical observed data. The black open circles (A) and squares (B) represent the observed data. Black solid lines represent the predicted and black dash lines show the 5<sup>th</sup> and 95<sup>th</sup> confidence interval.
