# Supplementary material for: Probenecid‐Boosted Tenofovir: A Physiologically‐Based Pharmacokinetic Model‐Informed Strategy for On‐Demand HIV Preexposure Prophylaxis
Source: PubMed Central journal article supplement — CPT Pharmacometrics Syst Pharmacol. 2019 Dec 23;9(1):40–7. doi: 10.1002/psp4.12481 (PMC6966182; doi:10.1002/psp4.12481), 2019-12-23
Supplement: PSP4-9-40-s004.pdf [file PSP4-9-40-s004.pdf]

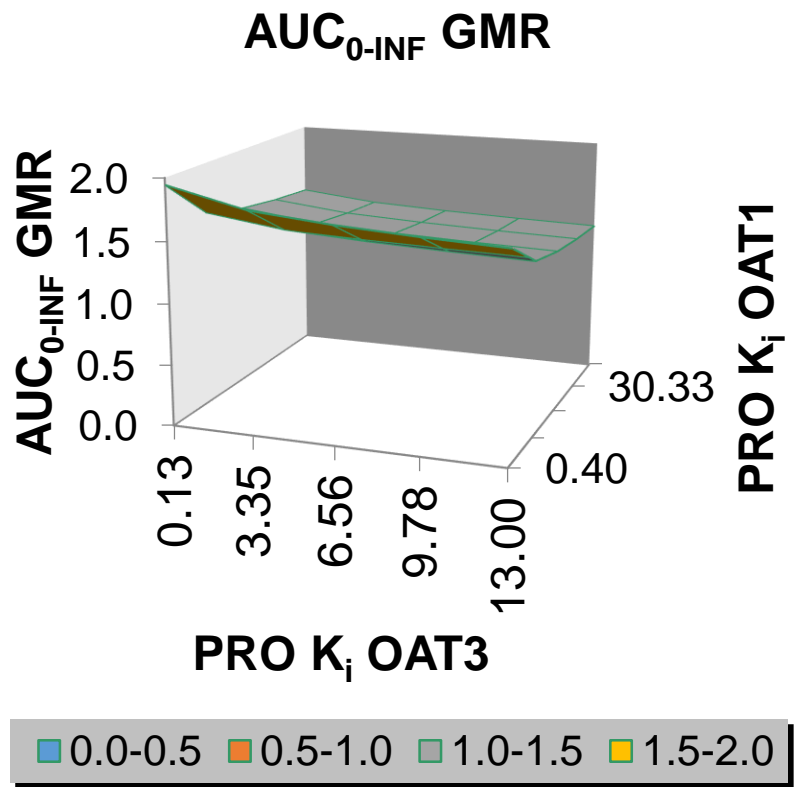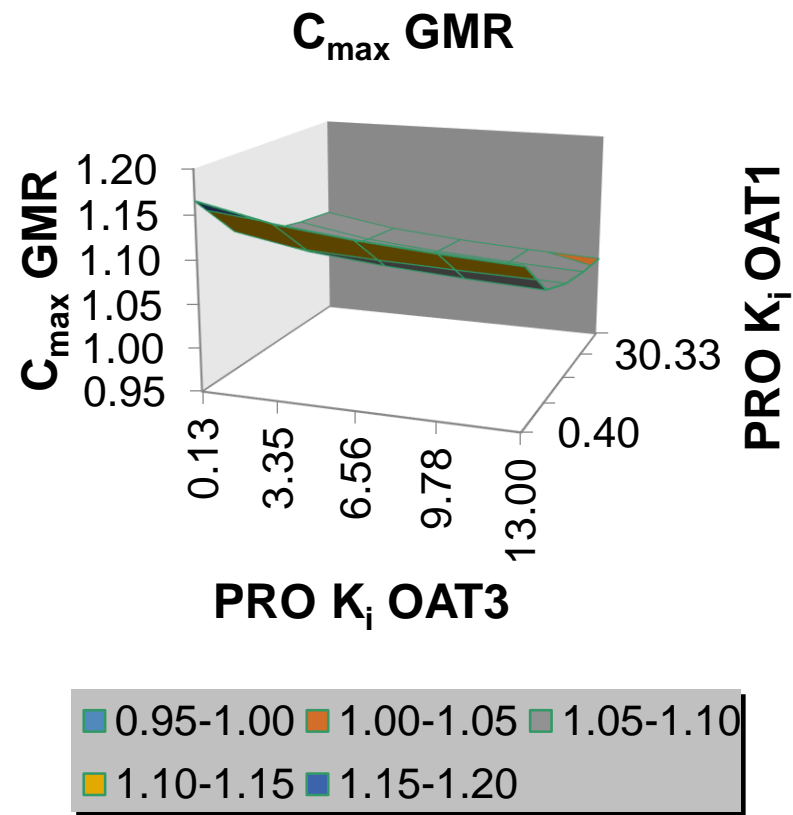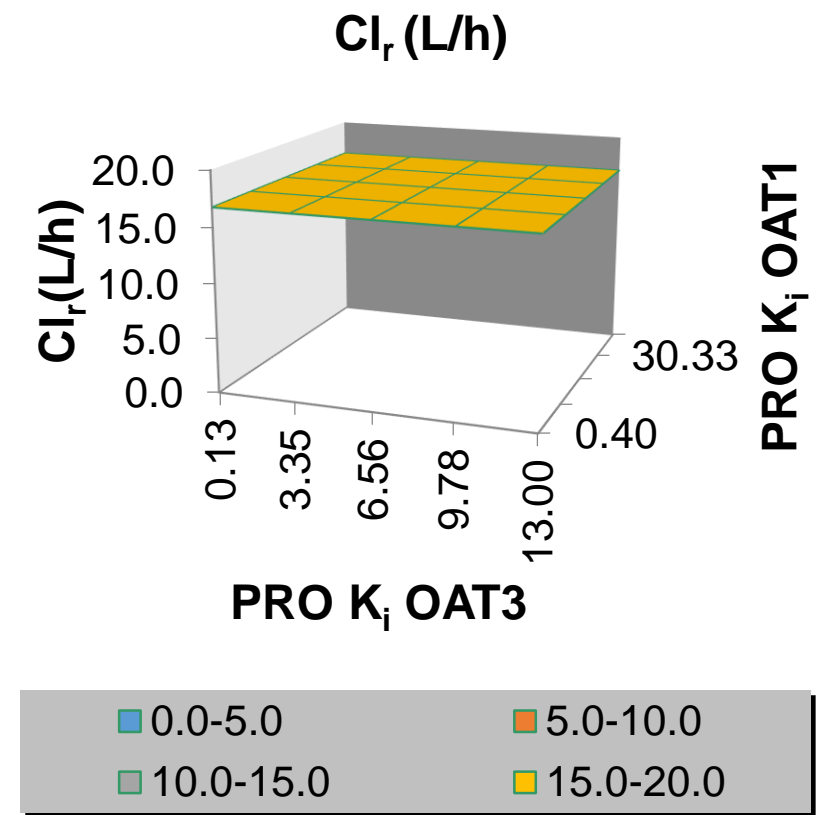

**Figure S4.** Sensitivity analysis on PRO OAT1 and 3 K<sub>i</sub> value and its effects on TFV plasma pharmacokinetic parameters TFV AUC<sub>0-∞</sub> geometric mean ratio (GMR), C<sub>max</sub> GMR, and renal clearance (Cl<sub>r</sub>).
