# Supplementary material for: Probenecid‐Boosted Tenofovir: A Physiologically‐Based Pharmacokinetic Model‐Informed Strategy for On‐Demand HIV Preexposure Prophylaxis
Source: PubMed Central journal article supplement — CPT Pharmacometrics Syst Pharmacol. 2019 Dec 23;9(1):40–7. doi: 10.1002/psp4.12481 (PMC6966182; doi:10.1002/psp4.12481), 2019-12-23
Supplement: PSP4-9-40-s005.pdf [file PSP4-9-40-s005.pdf]

| TFV PK Parameters | PRED             | OBS              | Fold-change |
|-------------------|------------------|------------------|-------------|
| Cmax (ng/mL)      | 261 (227-301)    | 263 (223-311)    | 1           |
| AUC0-24 (ng*h/mL) | 1964 (1602-2409) | 1737 (1485-2032) | 1.1         |
| Tmax (h)          | 0.85             | 0.5              | 1.7         |

**Table S1.** TFV pharmacokinetic parameters for a single-dose oral 300mg TDF predicted by the PBPK model compared to validation set using Wenning *et al* 2008. Represented as geometric mean (GM) and 95% confidence interval.
