# Supplementary material for: Probenecid‐Boosted Tenofovir: A Physiologically‐Based Pharmacokinetic Model‐Informed Strategy for On‐Demand HIV Preexposure Prophylaxis
Source: PubMed Central journal article supplement — CPT Pharmacometrics Syst Pharmacol. 2019 Dec 23;9(1):40–7. doi: 10.1002/psp4.12481 (PMC6966182; doi:10.1002/psp4.12481), 2019-12-23
Supplement: PSP4-9-40-s006.pdf [file PSP4-9-40-s006.pdf]

| <b>Parameter</b>                         | <b>SD TFV + PRO</b> | <b>SD TDF - PRO</b> | <b>% Fold change</b> |
|------------------------------------------|---------------------|---------------------|----------------------|
| Amt of substrate excreted unchanged (mg) | 53.27               | 53.41               | 0.99                 |
| Amt of substrate in kidney cell (mg)     | 0.06                | 0.17                | 0.35                 |

**Table S2.** PBPK model predicted maximum TFV exposure in renal cells in the presence and absence of PRO.
